# Supplementary material for: Diversified AIE and mechanochromic luminescence based on carbazole derivative decorated dicyanovinyl groups: effects of substitution sites and molecular packing
Source: Royal Society of Chemistry journal article supplement (doi:10.1039/c9ce01958h), 2020-01-01
Supplement: c9ce01958h1.pdf [file c9ce01958h1.pdf]

## Supporting Information

### **Diversified AIE and mechanochromic luminescence based on carbazole derivatives decorated dicyanovinyl groups: Effects of Substitution Site and Molecular Packing**

Kai Wang,<sup>‡,†</sup> Hui Xiao,<sup>‡,†</sup> Li Qian,<sup>†</sup> Mingxi Han,<sup>†</sup> Xianfeng Wu,<sup>†</sup> Zhiyong Guo,<sup>□,†,§</sup>  
and Hongbing Zhan<sup>□,†</sup>

<sup>†</sup>College of Materials Science and Engineering, Fuzhou University, Fuzhou 350108, Fujian, PR China

<sup>§</sup>Key Laboratory of Eco-materials Advanced Technology, Fuzhou University, Fujian Province, PR China

\* Corresponding authors.

E-mail address: guozhy@fzu.edu.cn (Zhiyong Guo) and [hbzhan@fzu.edu.cn](mailto:hbzhan@fzu.edu.cn) (Hongbing Zhan)

### Table of contents

|                                            |     |
|--------------------------------------------|-----|
| Section 1. FTIR spectra.....               | S2  |
| Section 2. NMR Spectra.....                | S3  |
| Section 3. Supplement spectra .....        | S7  |
| Section 4. X-ray Single Crystals Data..... | S10 |
| Section 5. Theoretical Calculation .....   | S13 |

## Section 1. FTIR spectra

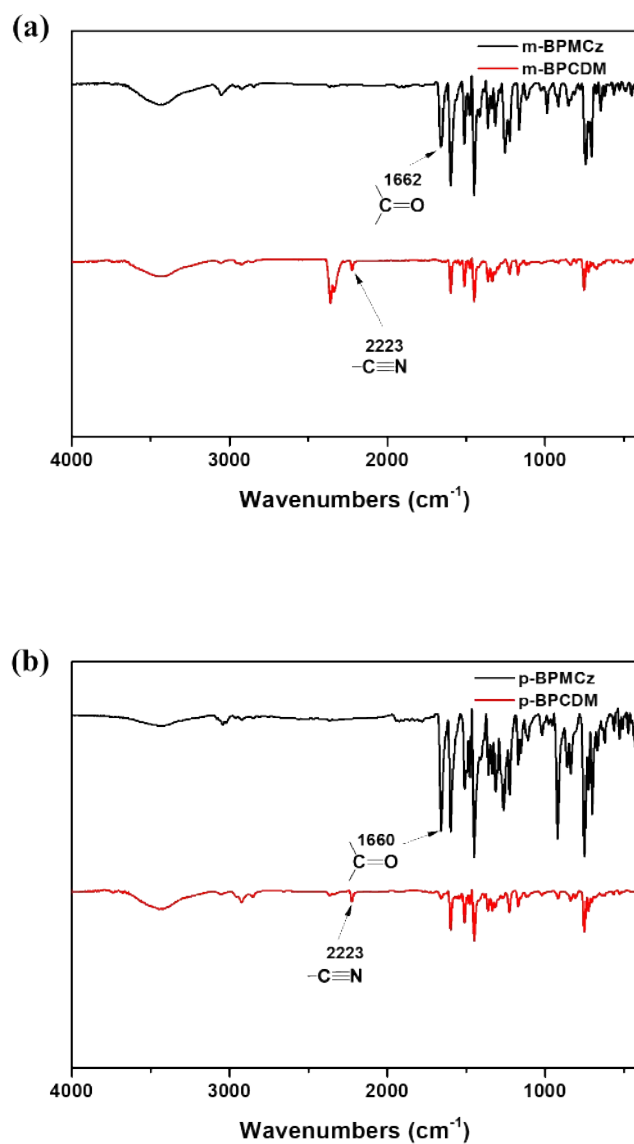

**Fig. S1** (a) FTIR spectrum of m-BPMCz and m-BPCDM. (b) FTIR spectrum of p- BPMCz and p-BPCDM.

## Section 2. NMR Spectra

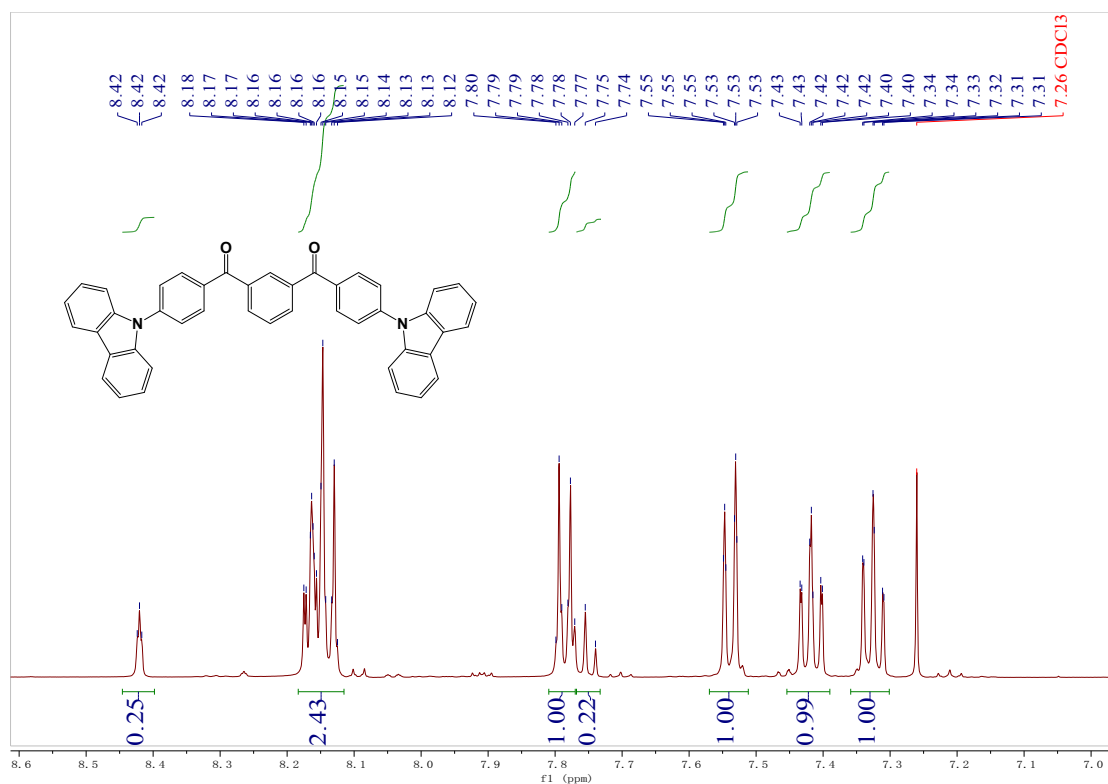

Fig. S2 <sup>1</sup>H NMR spectrum of m-BPMCz in CDCl<sub>3</sub>.

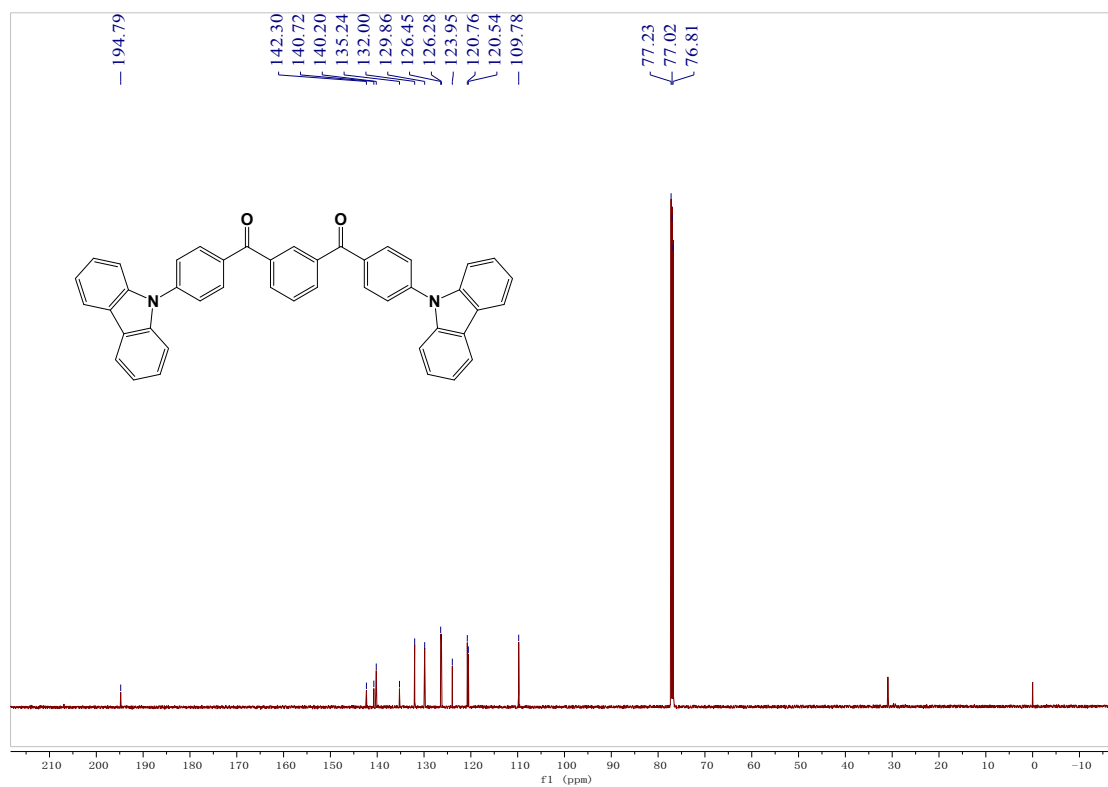

Fig. S3 <sup>13</sup>C NMR spectrum of m-BPMCz in CDCl<sub>3</sub>.

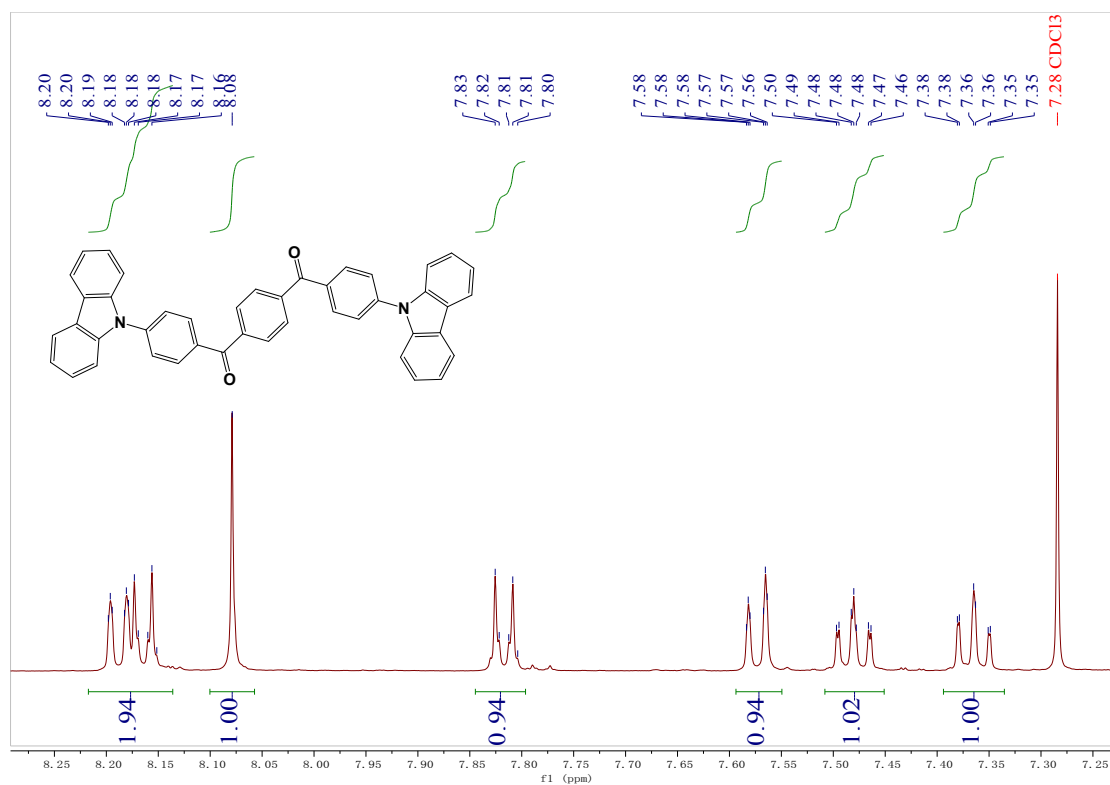

**Fig. S4** <sup>1</sup>H NMR spectrum of p-BPMCz in CDCl<sub>3</sub>.

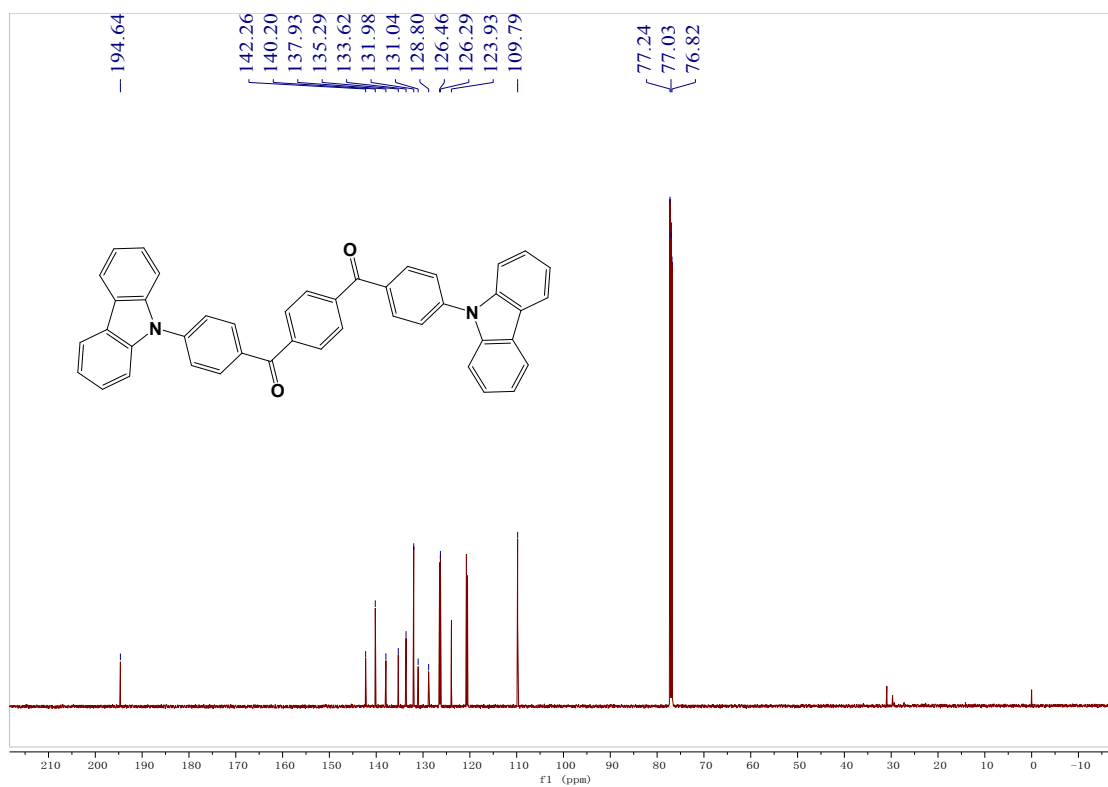

**Fig. S5** <sup>13</sup>C NMR spectrum of p-BPMCz in CDCl<sub>3</sub>.

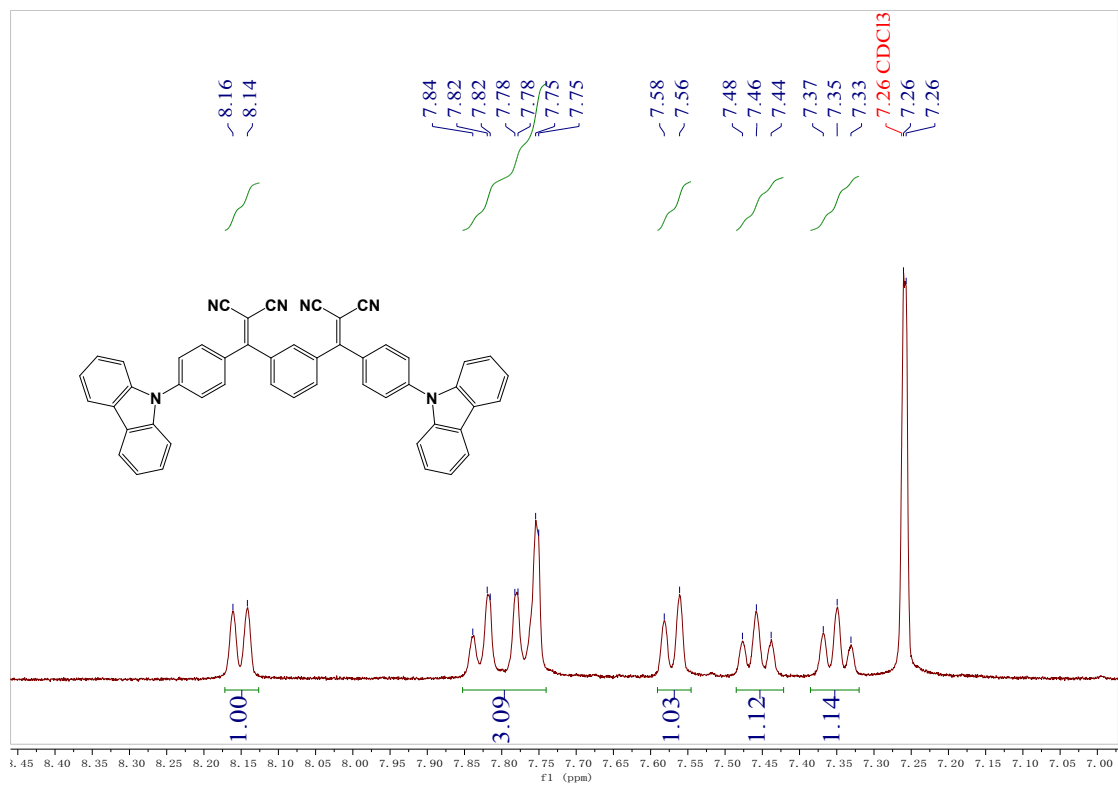

Fig. S6 <sup>1</sup>H NMR spectrum of m-BPCDM in CDCl<sub>3</sub>.

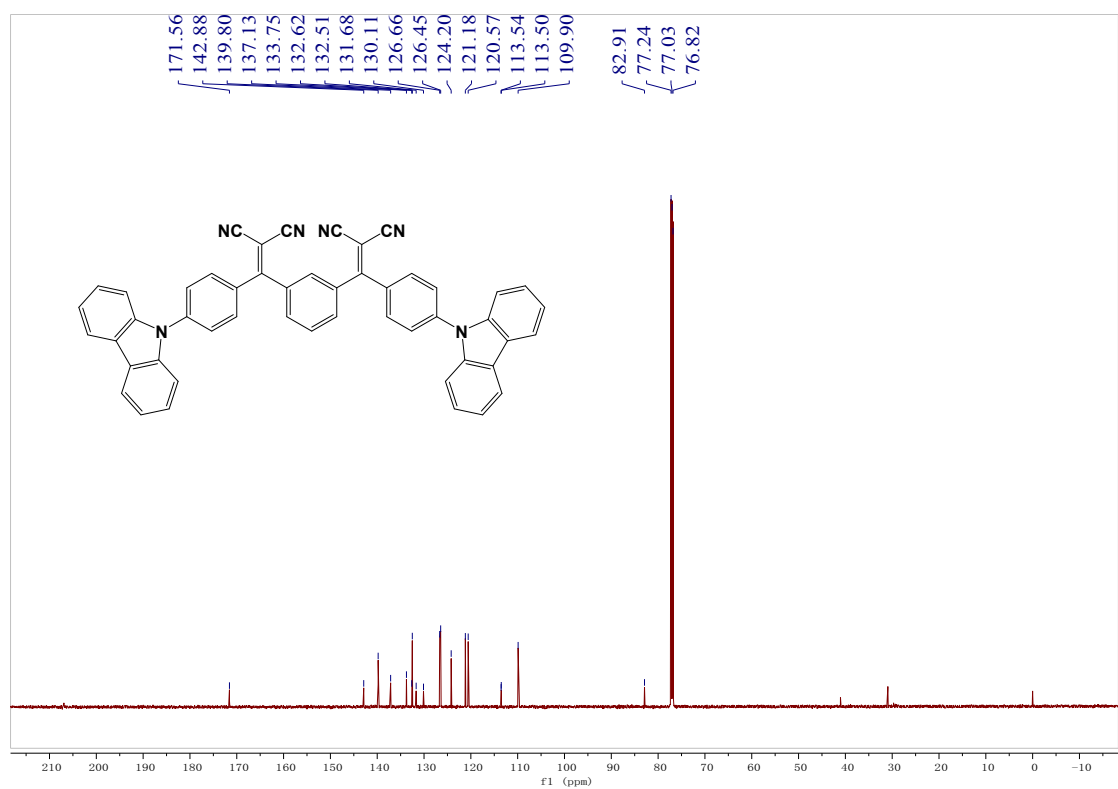

Fig. S7 <sup>13</sup>C NMR spectrum of m-BPCDM in CDCl<sub>3</sub>.

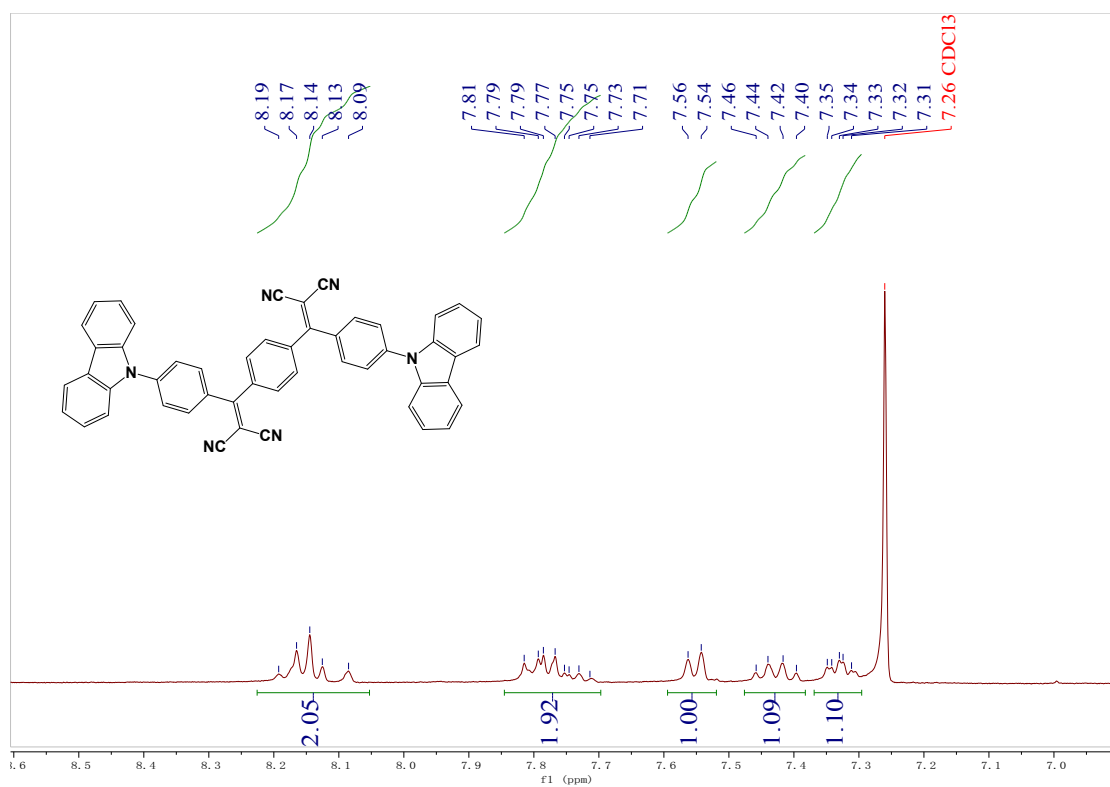

**Fig. S8** <sup>1</sup>H NMR spectrum of p-BPCDM in CDCl<sub>3</sub>.

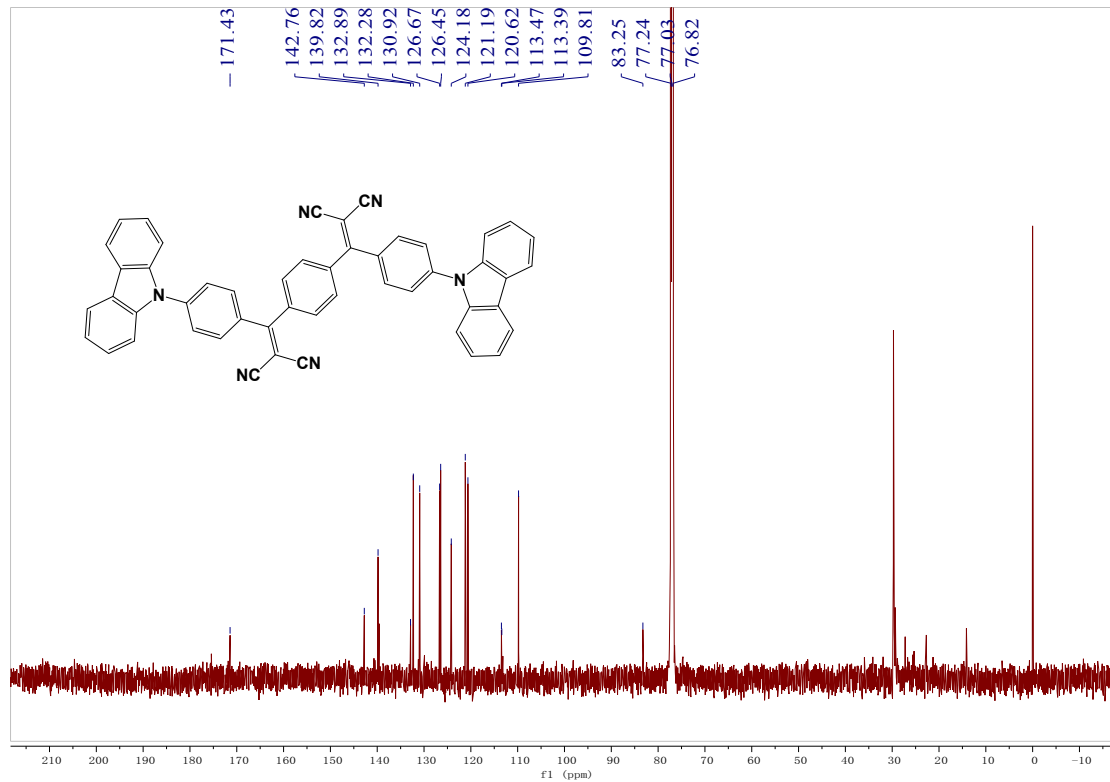

**Fig. S9** <sup>13</sup>C NMR spectrum of p-BPCDM in CDCl<sub>3</sub>.

### Section 3. Supplement spectra

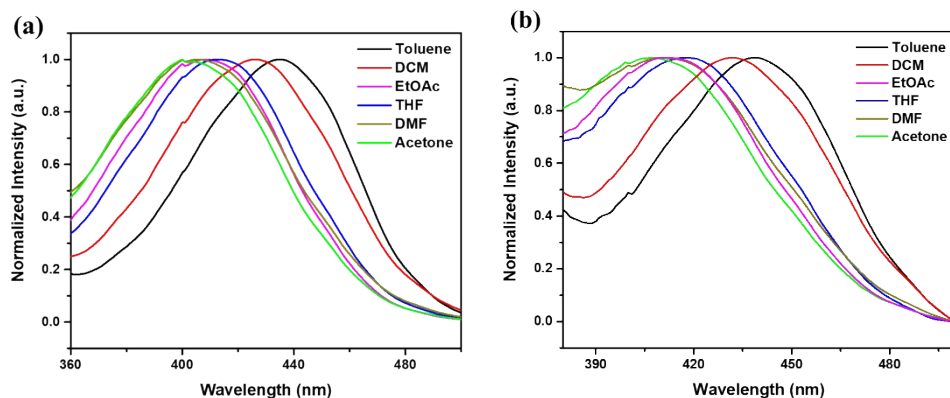

**Fig. S10** The characteristic absorption peaks of normalized UV absorption spectra of m-BPCDM (a) and p-BPCDM (b) in different solvents.

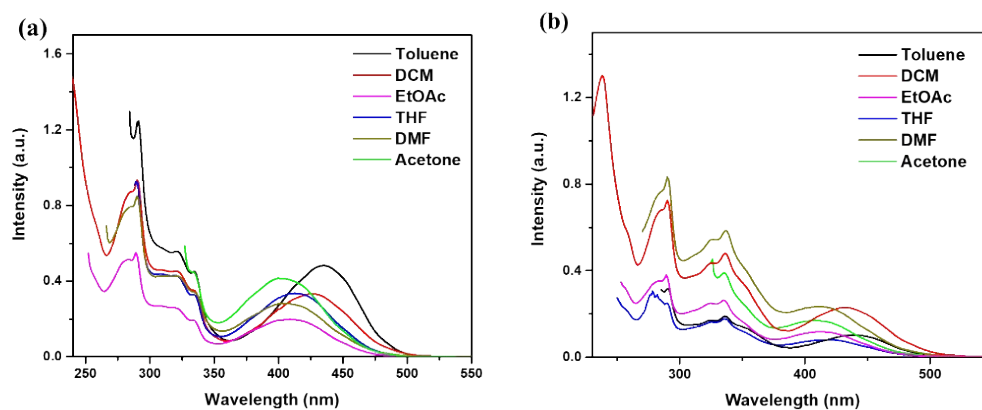

**Fig. S11** (a) UV absorption spectra of m-BPCDM in different solvents. (b) UV absorption spectra of p-BPCDM in different solvents.

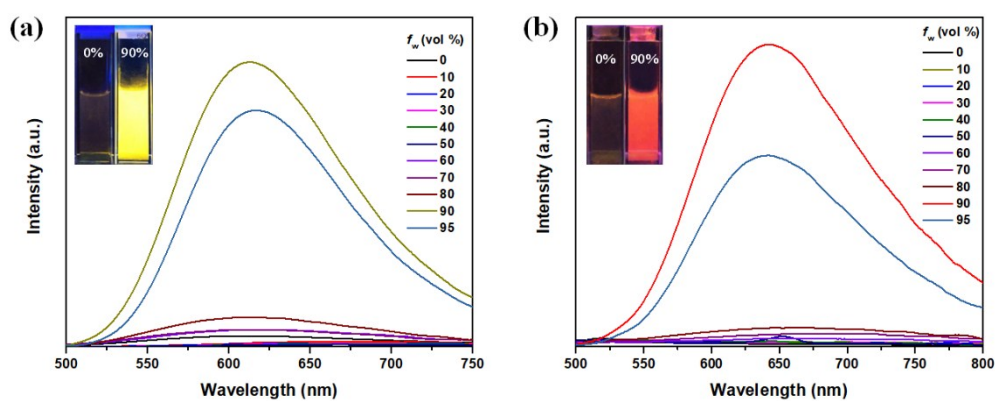

**Fig. S12** PL spectra of m-BPCDM (a) and p-BPCDM (b) in THF/water mixtures with different water fractions ( $f_w$ ). Concentration:  $10^{-5}$  M ( $f_w=0\%$ ); excitation wavelength: 377 nm.

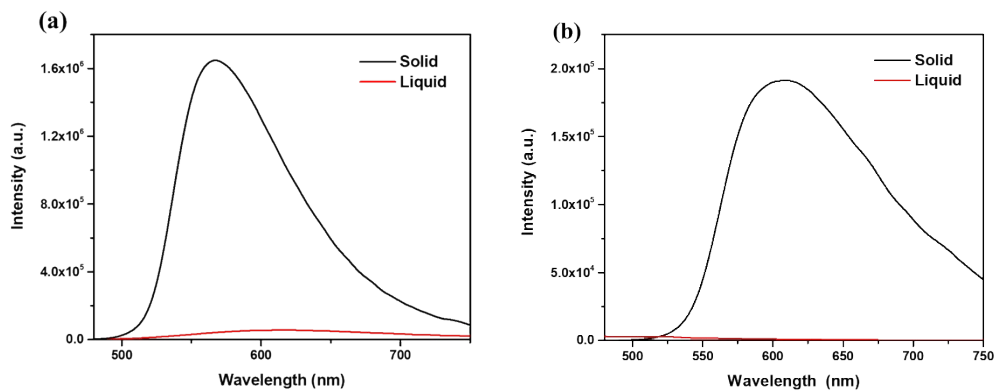

**Fig. S13** PL spectra of m-BPCDM (a) and p-BPCDM (b) in solid (crystal) and in acetone solution ( $10^{-4}$  M) under UV light.

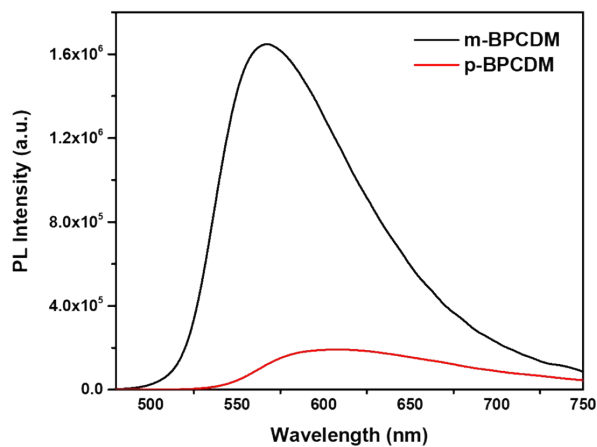

**Fig. S14** PL spectra of m-BPCDM and p-BPCDM in solid (crystal) state .

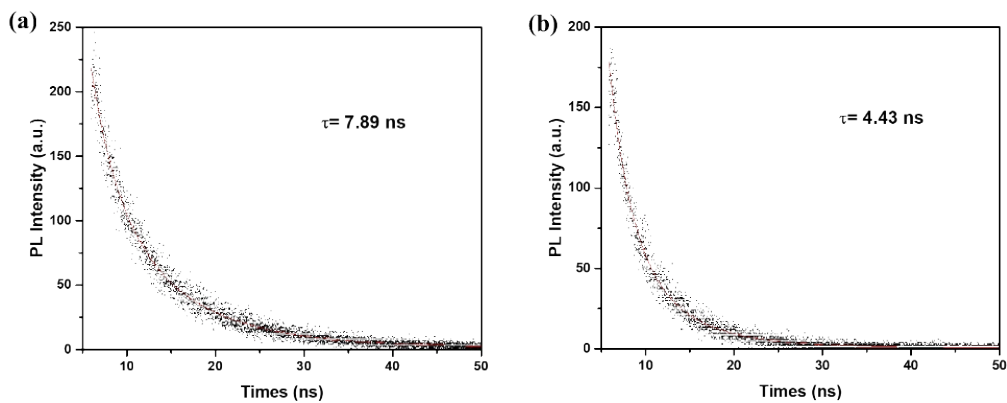

**Fig. S15** Transient decay spectra of m-BPCDM (a) and p-BPCDM (b) in crystal phase, monitored at 565 nm and 609 nm respectively.



The fluorescence decay curves attained by double exponential simulation. The fitting formula is:

$$y(t)=y_0+A_1\cdot\exp(-x/t_1)+A_2\cdot\exp(-x/t_2)$$

( $A_1$ ,  $A_2$  are the amplitude of two exponential components, and  $t_1$ ,  $t_2$  are the decay times of the two exponential components).

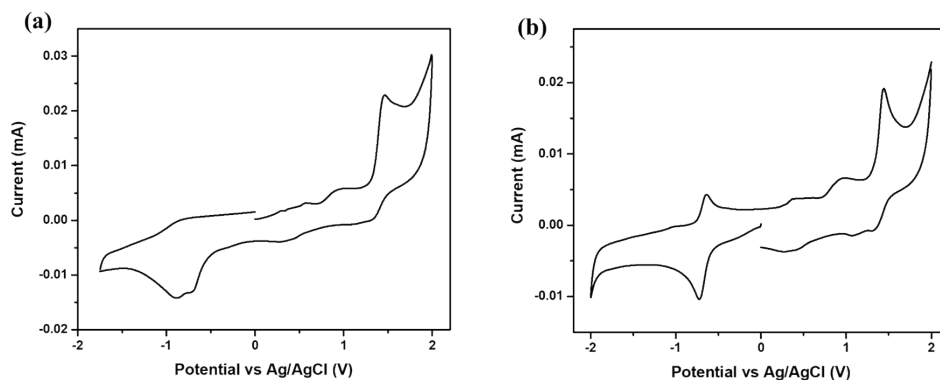

**Fig. S16** (a) CV diagrams of m-BPCDM. (b) CV diagrams of p-BPCDM. Cyclic voltammetry experiments calibrated by  $\text{Fc}/\text{Fc}^+$  with  $E_{1/2}$  of 0.45 V and 0.46 V respectively. Scan rate: 100 mV/s.

Concentration:  $10^{-4}$  M. Electrolyte: 0.1 M  $[(\text{nBu})_4\text{N}]\text{PF}_6$  in  $\text{CH}_3\text{CN}$ .

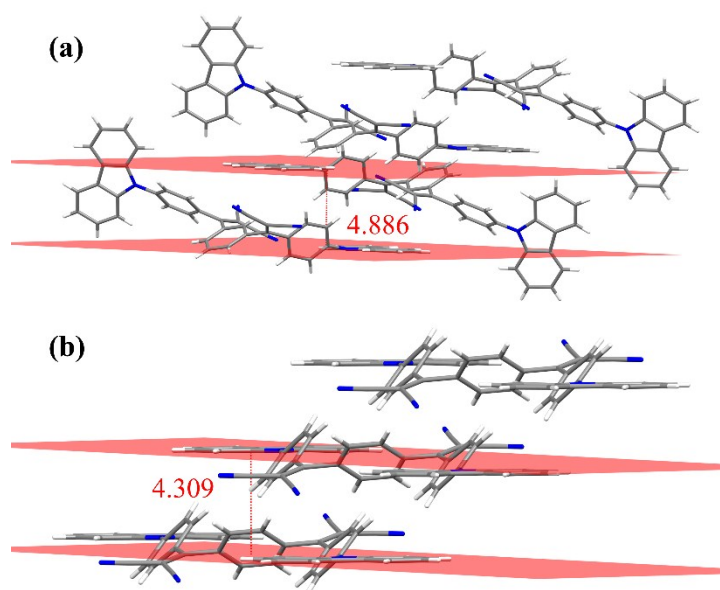

**Fig. S17** The vertical distance between two packing plane of m-BPCDM (a) and p-BPCDM (b).

## Section 4. X-ray Single Crystals Data

Crystals of m-BPCDM and p-BPCDM were grown in a vial with a mixture solvents of ethanol/dichloromethane/tetrahydrofuran. The vials were sealed by tin foil with several pinholes for evaporation. After that, their crystals were obtained in a few weeks, which were further analyzed by single-crystal x-ray crystallography.

A yellow block crystal picked up with paraton oil and mounted on a glass fiber was collected with a CCD area detector with graphite-monochromated Mo-K $\alpha$  radiation. Reflections were collected with a Bruker SMART APEX- $\text{II}$  detector and processed with SAINT from Bruker. Data were corrected for Lorentz and polarization effects. Structures were solved by direct methods using SHELXTL and were refined by full-matrix least-squares on  $F^2$  using SHELX-2014. Non-hydrogen atoms were refined with anisotropic displacement parameters during the final cycles. All hydrogen atoms of the organic molecule were placed by geometrical considerations and were added to the structure factor calculation. Solvent molecules in the crystal are highly disordered, and attempts to locate and refine these solvent peaks were unsuccessful. CCDC-1942676 and CCDC-1942677 contain the supplementary crystallographic data which can be obtained free of charge at <http://www.ccdc.cam.ac.uk/conts/retrieving.html> or from the Cambridge Crystallographic Data Center, 12, Union Road, Cambridge CB21EZ, UK; fax: (+44) 1223-336-033; or [deposit@ccdc.cam.ac.uk](mailto:deposit@ccdc.cam.ac.uk)).

**Table S1** Photophysical properties of the m-BPCDM and p-BPCDM in different solvents ( $10^{-5}$  M).

| <b>compounds</b> | <b>solvents</b>          | <b><math>\lambda_{\text{abs}}</math> (nm)</b> | <b><math>\lambda_{\text{em}}</math> (nm)</b> | <b><math>\Phi</math> (%)</b> |
|------------------|--------------------------|-----------------------------------------------|----------------------------------------------|------------------------------|
| <b>m-BPCDM</b>   | <b>Toluene</b>           | <b>435</b>                                    | <b>555</b>                                   | <b>3.60</b>                  |
|                  | <b>Dichloromethane</b>   | <b>426</b>                                    | <b>571</b>                                   | <b>1.38</b>                  |
|                  | <b>Ethyl acetate</b>     | <b>408</b>                                    | <b>598</b>                                   | <b>0.72</b>                  |
|                  | <b>Tetrahydrofuran</b>   | <b>413</b>                                    | <b>596</b>                                   | <b>0.30</b>                  |
|                  | <b>Dimethylformamide</b> | <b>407</b>                                    | <b>605</b>                                   | <b>0.15</b>                  |
|                  | <b>Acetone</b>           | <b>402</b>                                    | <b>608</b>                                   | <b>0.28</b>                  |
| <b>p-BPCDM</b>   | <b>Toluene</b>           | <b>439</b>                                    | <b>477</b>                                   | <b>4.02</b>                  |
|                  | <b>Dichloromethane</b>   | <b>432</b>                                    | <b>493</b>                                   | <b>1.14</b>                  |
|                  | <b>Ethyl acetate</b>     | <b>413</b>                                    | <b>564</b>                                   | <b>0.06</b>                  |
|                  | <b>Tetrahydrofuran</b>   | <b>418</b>                                    | <b>592</b>                                   | <b>0.20</b>                  |
|                  | <b>Dimethylformamide</b> | <b>412</b>                                    | <b>594</b>                                   | <b>4.22</b>                  |
|                  | <b>Acetone</b>           | <b>407</b>                                    | <b>603</b>                                   | <b>0.28</b>                  |

**Table S2** Crystallographic data of series.

| Crystal                                 | m-BPCDM                                                                             | p-BPCDM                                                                               |
|-----------------------------------------|-------------------------------------------------------------------------------------|---------------------------------------------------------------------------------------|
| Formula                                 | $C_{50}H_{28}N_6$                                                                   | $C_{25}H_{14}N_3 \cdot CH_2Cl_2$                                                      |
| Crystal system                          | triclinic                                                                           | triclinic                                                                             |
| Space group                             | P-1                                                                                 | P-1                                                                                   |
| <i>a</i> (Å)                            | 10.7183(12)                                                                         | 9.681(3)                                                                              |
| <i>b</i> (Å)                            | 13.8384(16)                                                                         | 10.530(3)                                                                             |
| <i>c</i> (Å)                            | 14.7191(17)                                                                         | 12.299(3)                                                                             |
| <i>α</i> (deg)                          | 95.994(2)                                                                           | 65.887(5)                                                                             |
| <i>β</i> (deg)                          | 98.595(2)                                                                           | 70.323(5)                                                                             |
| <i>γ</i> (deg)                          | 99.932(2)                                                                           | 85.583(6)                                                                             |
| <i>V</i> (Å <sup>3</sup> )              | 2107.24                                                                             | 1074.8(5)                                                                             |
| <i>Z</i>                                | 2                                                                                   | 2                                                                                     |
| <i>μ</i> (mm <sup>-1</sup> )            | 0.067                                                                               | 0.321                                                                                 |
| T (K)                                   | 200(2)                                                                              | 200(2)                                                                                |
| $\theta_{\min}$ - $\theta_{\max}$ (deg) | 1.412-27.828                                                                        | 1.926-28.549                                                                          |
| <i>R</i> <sub>1</sub>                   | 0.0884                                                                              | 0.0691                                                                                |
| w <i>R</i> <sub>2</sub>                 | 0.2818                                                                              | 0.2165                                                                                |
| GOOF                                    | 0.993                                                                               | 1.048                                                                                 |
| Crystal pictures                        | 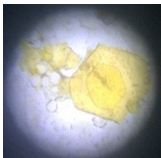 |  |
| CCDC number                             | 1942676                                                                             | 1942677                                                                               |

## Section 5. Theoretical Calculation

**Table S3** Molecular orbital amplitude plots of both HOMO and LUMO calculated by the B3LYP/6-31G(d) basis set.

| Compound | LUMO                                                                                                                                                             | HOMO                                                                                 |
|----------|------------------------------------------------------------------------------------------------------------------------------------------------------------------|--------------------------------------------------------------------------------------|
| m-BPCDM  | 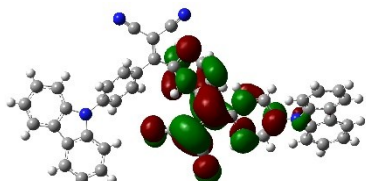 <p>LUMO: -3.06 eV<br/><math>\Delta E = 2.34</math> eV<br/>HOMO: -5.40 eV</p>   |    |
| p-BPCDM  |  <p>LUMO: -3.16 eV<br/><math>\Delta E = 2.51</math> eV<br/>HOMO: -5.67 eV</p>   |    |
| m-BPMCz  |  <p>LUMO: -1.99 eV<br/><math>\Delta E = 3.40</math> eV<br/>HOMO: -5.39 eV</p> |  |
| p-BPMCz  |  <p>LUMO: -2.34 eV<br/><math>\Delta E = 3.17</math> eV<br/>HOMO: -5.51 eV</p> |  |
